# Supplementary material
Source: Springer Nature journal article supplement (https://www.springerprofessional.de/resource/supplementary/13638_2011_184_MOESM2_ESM.pdf/11897244)

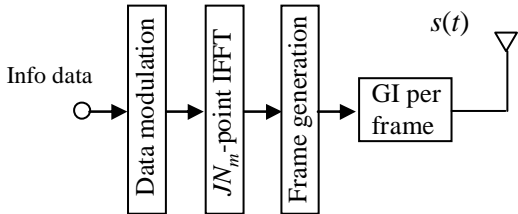

(a) Transmitter

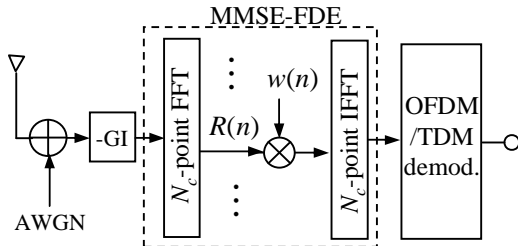

(b) Receiver

Supplement: MOESM2 [file 11897244]
